# Supplementary material for: Emulating the short-term plasticity of a biological synapse with a ruthenium complex-based organic mixed ionic–electronic conductor
Source: Royal Society of Chemistry journal article supplement (doi:10.1039/d1ma01078f), 2022-01-01
Supplement: d1ma01078f1.pdf [file d1ma01078f1.pdf]

## Emulating Short-Term Plasticity of a Biological Synapse with a Ruthenium Complex-based Organic Mixed Ionic-Electronic Conductor

Samuel Shin<sup>a,b</sup>, Dae Cheol Kang<sup>a,c</sup>, Keonhee Kim<sup>a,c</sup>, Yeonjoo Jeong<sup>a</sup>, Jaewook Kim<sup>a</sup>, Suyoun Lee<sup>a</sup>, Joon Young Kwak<sup>a</sup>, Jongkil Park<sup>a</sup>, Gyu Weon Hwang<sup>a</sup>, Kyeong-Seok Lee<sup>a</sup>, Jong Keuk Park<sup>a</sup>, Jian Li<sup>b,\*</sup>, and Inho Kim<sup>a,\*</sup>

<sup>a</sup> Neuromorphic Engineering, Korea Institute of Science and Technology, Seoul 02792, South Korea

<sup>b</sup> Materials Science and Engineering, Arizona State University, Tempe, Arizona 85284, United States

<sup>c</sup> School of Electrical Engineering, Korea University, Seoul 02841, South Korea

\* Corresponding authors.

*E-mail addresses:* [jian.li@asu.edu](mailto:jian.li@asu.edu) (J. Li), [inhok@kist.re.kr](mailto:inhok@kist.re.kr) (I. Kim)

## OMIEC Device Structure.

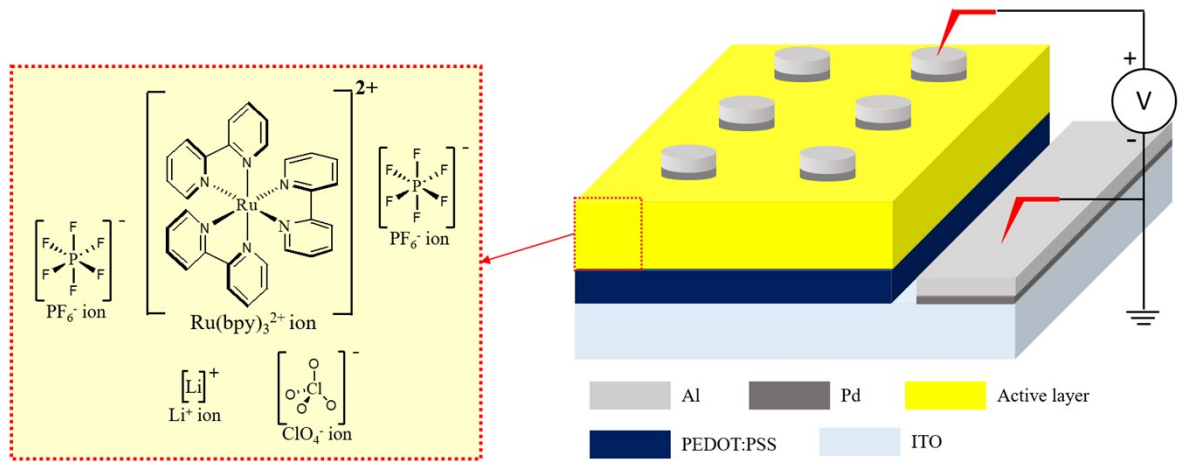

**Fig. S1.** Schematic structure of an OMIEC memristor device. The active layer consists of Ru(bpy)<sub>3</sub><sup>2+</sup> ions and PF<sub>6</sub><sup>-</sup> ions with different concentrations of Li<sup>+</sup> ions and ClO<sub>4</sub><sup>-</sup> ions

### Equivalent Circuit Model.

The equivalent circuit model was modified and employed for our memristor devices in Fig. 3c [1–3]. The selected equivalent circuit includes a parallel circuit which consists of total electrical resistance of active layer ( $R_E$ ), a constant phase element of geometric capacitance ( $CPE_{GEO}$ ), capacitors of the electric double layers (EDLs) at the anode and cathode ( $C_{EDL1}$  and  $C_{EDL2}$ ), resistances of the EDLs ( $R_{EDL1}$  and  $R_{EDL2}$ ), and bulk ionic resistance of active layer ( $R_{ions}$ ). This parallel circuit is connected with all external resistance ( $R_{EXT}$ ) in series.

Constant phase element (CPE) was used because it is a model of an imperfect capacitor in an equivalent electrical circuit [3]. The impedance of the CPE can be described by the function

$$Z_{CPE} = \frac{1}{Q(i\omega)^\alpha} \quad (S1)$$

where  $\omega$  is the applied frequency,  $Q$  is the magnitude of  $1/|Z|$  at  $\omega = 1$  rad/s, and  $\alpha$  is the phase of the element.  $Q$  does not have a meaningful physical value, but  $Q$  is a capacitor or a resistor when  $\alpha$  is 1 or 0, respectively.

**Table S1.**

Parameters extracted from the equivalent circuit model of OMIEC memristor devices.

|           | $R_{EXT}$<br>(k $\Omega$ ) | $R_E$<br>(M $\Omega$ ) | $Q_{GEO}$<br>( $\times 10^{-11}$ ) | $\alpha_{GEO}$ | $R_{ION}$<br>(M $\Omega$ ) | $C_{EDL1}$<br>(nF) | $R_{EDL1}$<br>(p $\Omega$ ) | $C_{EDL2}$<br>(nF) | $R_{EDL2}$<br>(p $\Omega$ ) |
|-----------|----------------------------|------------------------|------------------------------------|----------------|----------------------------|--------------------|-----------------------------|--------------------|-----------------------------|
| Device-P  | 40                         | 233                    | 4.6                                | 0.87           | 51.1                       | 71                 | 3.7                         | 88                 | 3.9                         |
| Device-1S | 40                         | 125                    | 4.8                                | 0.86           | 18.5                       | 24                 | 8.3                         | 74                 | 4.8                         |
| Device-2S | 40                         | 49.8                   | 5.1                                | 0.85           | 7.50                       | 93                 | 4.2                         | 53                 | 7.0                         |

### Ion concentration.

Various concentrations of  $\text{LiClO}_4$  salt were added into  $\text{Ru}(\text{bpy})_3(\text{PF}_6)_2$  for tuning ion conductivity in an active layer of the OMIEC device. Fig. S2 indicated 2 wt% of salt additive have the highest ion conductivity in  $\text{Ru}(\text{bpy})_3(\text{PF}_6)_2$ , and the device demonstrated similar timescales of short-term plasticity properties with biological synapse. The ion conductivity increases until 2 wt% of  $\text{LiClO}_4$  because the low conductivity of  $\text{Ru}(\text{bpy})_3^{2+}$  cation can be compensated by adding  $\text{Li}^+$  ions that are smaller in their size and thus have higher mobility than the  $\text{Ru}(\text{bpy})_3^{2+}$  ions. However, ion conductivity decreases higher than 2 wt% of  $\text{LiClO}_4$ , and the ion conductivity with a high ( $\geq 4$  wt%) concentration of  $\text{LiClO}_4$  showed similar or lower ion conductivity than pure  $\text{Ru}(\text{bpy})_3(\text{PF}_6)_2$  device. This showed the high concentration of  $\text{LiClO}_4$  salts scatter and interrupt ion transport, leading to decrease the ion conductivity in our OMIEC memristor. A similar phenomenon can be found in the reference.[2]

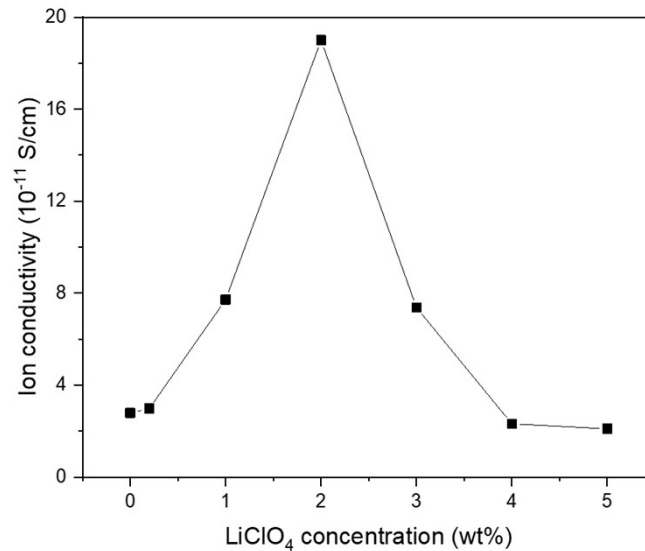

**Fig. S2.** Ion conductivity versus salt concentration data.

### Pinched memristor hysteresis behavior.

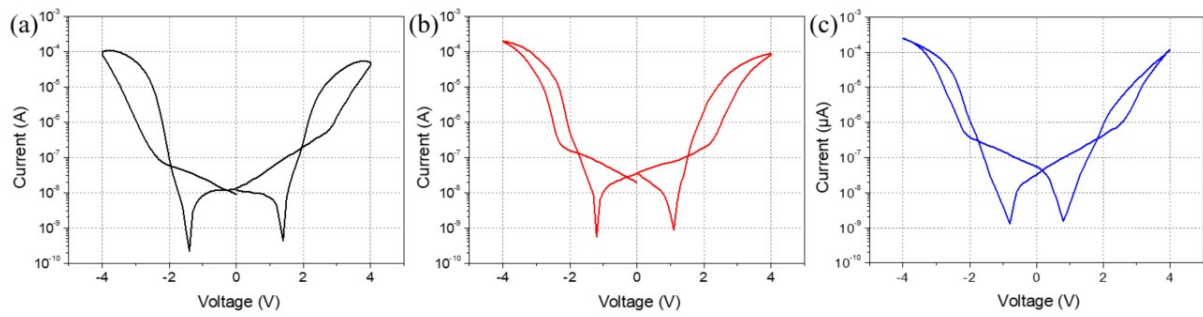

**Fig. S3.** Current versus voltage curves in semi-log scales of (a) Device-P, (b) Device-1S, and (c) Device-2S.

## Turn-on time and relaxation time.

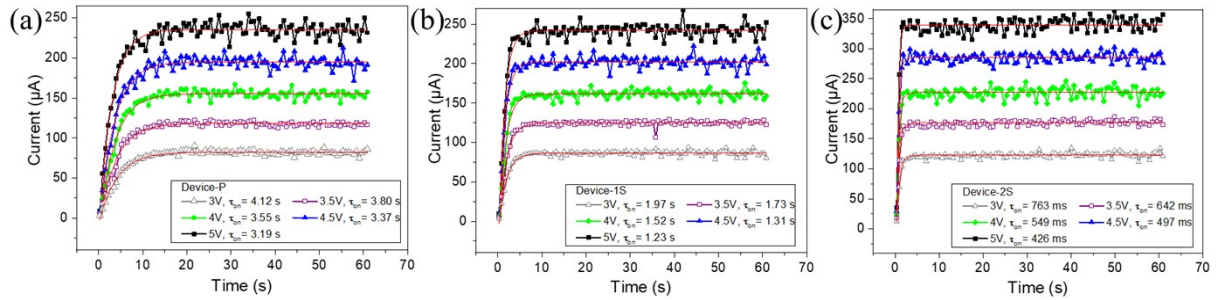

**Fig. S4.** The time-dependent current spectra for turn-on time of (a) Device-P, (b) Device-1S, and (c) Device-2S by varying the applied voltage from 3 to 5 V as indicated. The acquired data were fitted to Equation (1) as illustrated with solid red lines.

**Table S2.**

Measured turn-on time values by conducting on 10 virgin devices (3.5 V) and their average,

|           | Device #1 (s) | Device #2 (s) | Device #3 (s) | Device #4 (s) | Device #5 (s) | Device #6 (s) | Device #7 (s) | Device #8 (s) | Device #9 (s) | Device #10 (s) | Average (s) | Standard deviation (s) |
|-----------|---------------|---------------|---------------|---------------|---------------|---------------|---------------|---------------|---------------|----------------|-------------|------------------------|
| Device-P  | 3.8           | 4.1           | 3.9           | 4.0           | 3.4           | 3.8           | 3.7           | 3.5           | 3.9           | 3.8            | 3.8         | 0.21                   |
| Device-1S | 1.7           | 1.3           | 2.0           | 2.2           | 1.8           | 1.5           | 1.7           | 1.7           | 1.5           | 1.9            | 1.7         | 0.26                   |
| Device-2S | 0.64          | 0.49          | 0.74          | 0.66          | 0.71          | 0.52          | 0.58          | 0.62          | 0.79          | 0.6            | 0.64        | 0.09                   |

standard deviation.

**Table S3.**

Measured stabilized current values by conducting on 10 virgin devices (3.5 V) and their

|           | Device #1 (µA) | Device #2 (µA) | Device #3 (µA) | Device #4 (µA) | Device #5 (µA) | Device #6 (µA) | Device #7 (µA) | Device #8 (µA) | Device #9 (µA) | Device #10 (µA) | Average (µA) | Standard deviation (µA) |
|-----------|----------------|----------------|----------------|----------------|----------------|----------------|----------------|----------------|----------------|-----------------|--------------|-------------------------|
| Device-P  | 108            | 115            | 129            | 124            | 99             | 106            | 112            | 130            | 124            | 119             | 117          | 10.3                    |
| Device-1S | 128            | 141            | 112            | 135            | 125            | 117            | 137            | 124            | 128            | 131             | 128          | 8.38                    |
| Device-2S | 0.64           | 0.49           | 0.74           | 0.66           | 0.71           | 0.52           | 0.58           | 0.62           | 0.79           | 0.6             | 178          | 10.4                    |

average, standard deviation.

**Table S4.**

Measured relaxation time values by conducting on 10 virgin devices (1.5 V) and their average, standard deviation.

|           | Device #1 (s) | Device #2 (s) | Device #3 (s) | Device #4 (s) | Device #5 (s) | Device #6 (s) | Device #7 (s) | Device #8 (s) | Device #9 (s) | Device #10 (s) | Average (s) | Standard deviation (s) |
|-----------|---------------|---------------|---------------|---------------|---------------|---------------|---------------|---------------|---------------|----------------|-------------|------------------------|
| Device-P  | 3.5           | 2.8           | 3.3           | 4.3           | 4.0           | 3.5           | 2.9           | 3.2           | 3.7           | 3.8            | 3.5         | 0.47                   |
| Device-1S | 1.7           | 1.2           | 1.7           | 2.3           | 1.9           | 2.6           | 2.0           | 1.3           | 1.1           | 1.5            | 1.7         | 0.48                   |
| Device-2S | 0.81          | 0.72          | 0.77          | 0.80          | 0.91          | 0.88          | 0.87          | 0.82          | 0.79          | 0.75           | 0.81        | 0.06                   |

**Table S5.**

Measured stabilized current values by conducting on 10 virgin devices (1.5 V) and their

|           | Device #1 ( $\mu\text{A}$ ) | Device #2 ( $\mu\text{A}$ ) | Device #3 ( $\mu\text{A}$ ) | Device #4 ( $\mu\text{A}$ ) | Device #5 ( $\mu\text{A}$ ) | Device #6 ( $\mu\text{A}$ ) | Device #7 ( $\mu\text{A}$ ) | Device #8 ( $\mu\text{A}$ ) | Device #9 ( $\mu\text{A}$ ) | Device #10 ( $\mu\text{A}$ ) | Average ( $\mu\text{A}$ ) | Standard deviation ( $\mu\text{A}$ ) |
|-----------|-----------------------------|-----------------------------|-----------------------------|-----------------------------|-----------------------------|-----------------------------|-----------------------------|-----------------------------|-----------------------------|------------------------------|---------------------------|--------------------------------------|
| Device-P  | 1.34                        | 1.28                        | 1.23                        | 1.11                        | 1.17                        | 1.31                        | 1.26                        | 1.07                        | 1.29                        | 1.37                         | 1.24                      | 0.10                                 |
| Device-1S | 3.01                        | 1.91                        | 2.99                        | 3.37                        | 2.48                        | 2.43                        | 2.85                        | 3.13                        | 2.77                        | 2.59                         | 2.75                      | 0.42                                 |
| Device-2S | 4.44                        | 5.12                        | 5.61                        | 4.03                        | 3.87                        | 6.02                        | 4.79                        | 4.63                        | 5.75                        | 5.12                         | 4.94                      | 0.72                                 |

average, standard deviation.

## Paired-pulse facilitation.

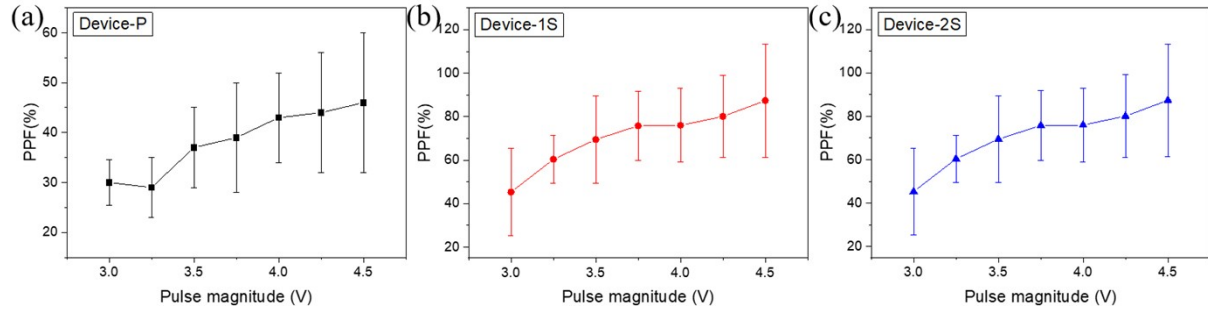

**Fig. S5.** PPF data and its statistical distribution as a function of the pulse magnitude with fixed pulse interval and duration at 50 ms and 100 ms, respectively, for (a) Device-P (black square), (b) Device-1S (red circle), and (c) Device-2S (blue triangle).

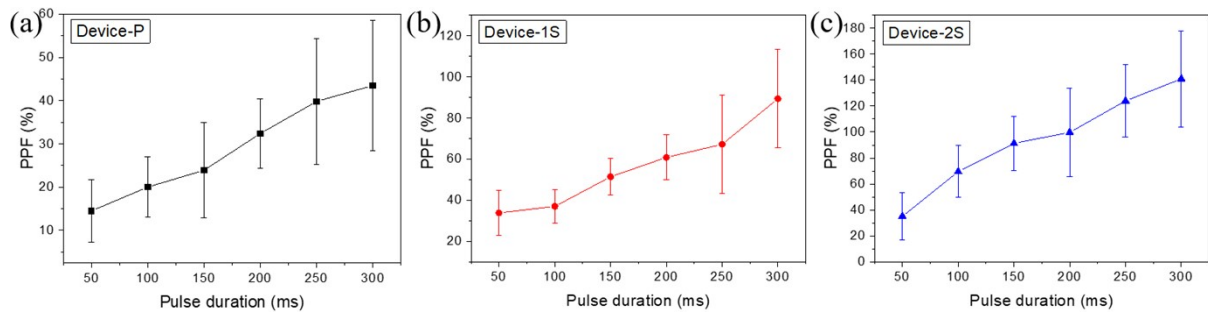

**Fig. S6.** PPF data and its statistical distribution as a function of the pulse duration with fixed pulse interval and magnitude at 50 ms and 3.5 V, respectively, for (a) Device-P (black square), (b) Device-1S (red circle), and (c) Device-2S (blue triangle).



## VM model and fitting data.

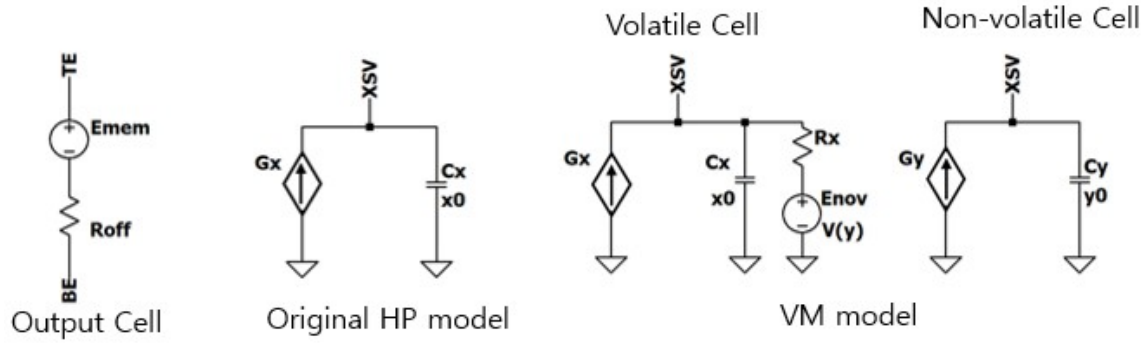

**Fig. S7.** Circuit schemes of the VM model.

The volatile memory model (VM model) was implemented by adding volatile properties to the HP model. The overall structure consists of a high resistance state ( $R_{off}$ ) and a low resistance state ( $R_{on}$ ).

$$R_{mem}(x) = (R_{on} - R_{off})x + R_{off} = \frac{v}{I_{mem}}, \quad 0 < x < 1$$

where  $R_{mem}$  is the total resistance of the device,  $V$  is an applied voltage, and  $I_{mem}$  is the current flow through the memristor.  $x$  is a state variable suggested by Leon Chua, which depends on the voltage applied to the device, determined by[4];

$$\frac{dx(t)}{dt} = \mu_v \frac{R_{on}}{D} I(t) f(x)$$

where  $\mu_v$  is dopant mobility,  $D$  is the thickness of the insulator between two electrodes, and  $f(x)$  is the window function proposed to solve the boundary condition issues.

In the VM model, a volatile cell part is added to recover the resistance of the device to its original state when the voltage is not applied.

$$x_0 = y_0 = \frac{R_{off} - R_{init}}{R_{off} - R_{on}}$$

$$\text{Volatile Cell : } C_x \frac{dx}{dt} = -\frac{x-y}{R_x} + I_0(x)$$

$$\text{Non - volatile Cell : } C_y \frac{dy}{dt} = I_0(y)$$

$$I_0(h) = \frac{I_{mem} \cdot u_v \cdot R_{on} \cdot f(h)}{D^2}$$

Here, we use the Joglekar function as a window function, which is given by;

$$f(h) = 1 - (2x - 1)^{2p}$$

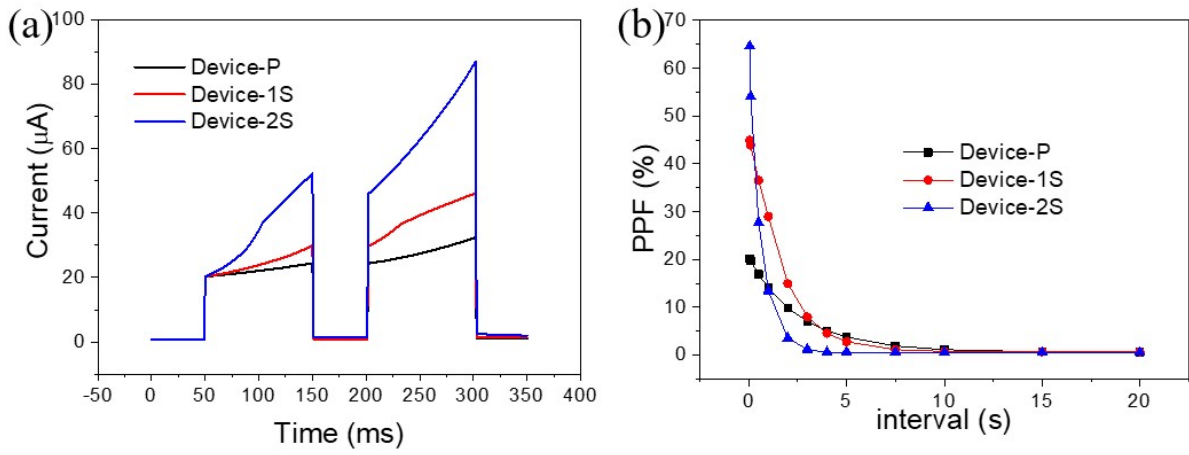

**Fig. S8.** Volatile model fitting result; (a) 50 ms interval PPF (b) tuning pulse interval

## ECM device data and Yakopcic model

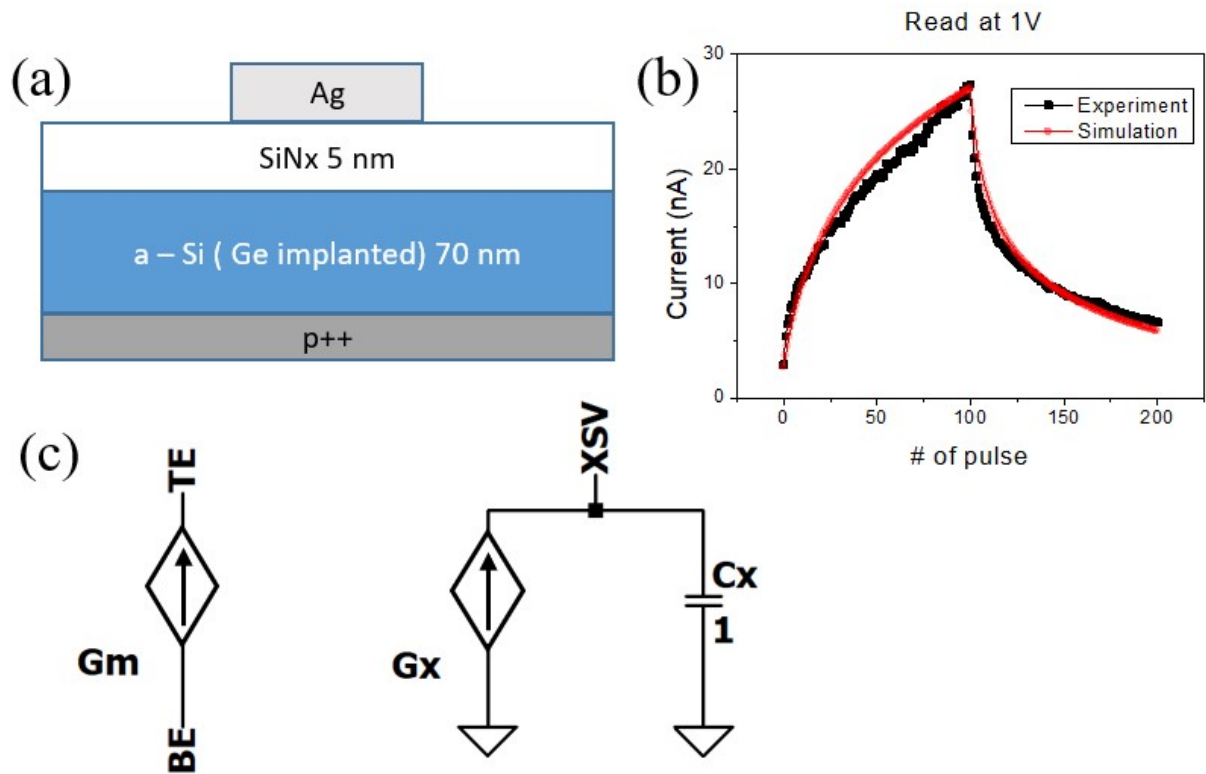

**Fig. S9.** (a) Schematic structure and (b) potentiation/depression test (PD test) and simulation result of the ECM device. (c) Circuit schemes of Yakopcic memristor model.

As a non-volatile device, we used Ag / SiNx / Ge implanted a-Si / p-Si ECM device (Fig. S8a), deposited a-Si with low-pressure chemical vapor deposition (LPCVD), SiNx with plasma-enhanced chemical vapor deposition (PECVD), Ag with a thermal evaporator, and implanted Ge with a 400-kV ion implanter. For measuring electrical characteristics of the device, a voltage is applied to Ag top electrode, and the low-resistance p-Si is grounded. The filament is formed at a positive voltage, lowering the resistance (set), and then ruptured at a negative voltage (reset). At the PD test, the set pulse condition is 12 V with 100  $\mu$ s, and the reset pulse condition is -8 V with 100  $\mu$ s (Fig. S8b). The resistance of the device is about 4 G $\Omega$ , but in the simulation, it is lowered to about 100 K $\Omega$  because the resistance should be lower than that of the OMIEC memristor.

Yakopcic memristor model introduced threshold voltage effect in the metal-insulator-metal structure.

$$I_{Gm}(t) = \begin{cases} a_1 x(t) \sinh(bV(t)), & V(t) \geq 0 \\ a_2 x(t) \sinh(bV(t)), & V(t) < 0 \end{cases}$$

$$I_{Gx}(t) = g(V(t))f(V(t),x(t))$$

State variable  $x(t)$  is;

$$x(t) = \int_0^t i(t) dt$$

The function  $g(V(t))$  presents the threshold voltage, and  $f(V(t),x(t))$  represents the change of the state variable at the boundary.

$$g(V(t)) = \begin{cases} A_p(e^{V(t)} - e^{V_p}), & V(t) > V_p \\ -A_n(e^{-V(t)} - e^{V_n}), & V(t) < -V_n \\ 0, & -V_n \leq V(t) \leq V_p \end{cases}$$

$$f(x) = \begin{cases} e^{-\alpha_p(x-x_p)} \omega_p, & x \geq x_p \\ 1, & x < x_p \end{cases}, \quad \omega_p = \frac{x_p - x}{1 - x_p} + 1$$

$$f(x) = \begin{cases} e^{\alpha_n(x+x_n-1)} \omega_n, & x \geq x_p \\ 1, & x < x_p \end{cases}, \quad \omega_n = \frac{x}{1 - x_n}$$

where  $V_p, V_n$  is the threshold voltage,  $a_1, a_2, b, A_p, A_n, \alpha_p, \alpha_n, x_p$ , and  $x_n$  are fitting parameters.

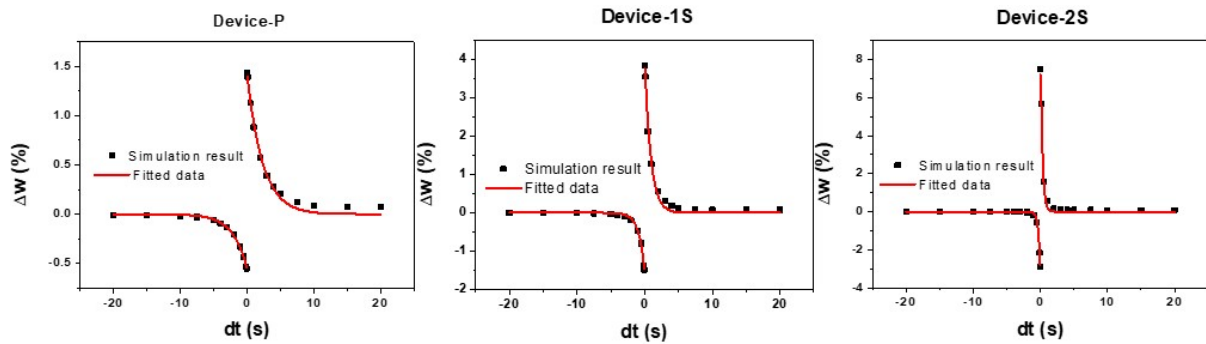

**Fig. S10.** STDP simulation and fitting result; as the salt concentration increases, the maximum value of  $\Delta w$  increases, and the value of  $\tau_{\text{STDP}}$  decreases.

## Reference

- [1] A. Munar, A. Sandström, S. Tang, L. Edman, Shedding Light on the Operation of Polymer Light-Emitting Electrochemical Cells Using Impedance Spectroscopy, *Adv. Funct. Mater.* 22 (2012) 1511–1517. <https://doi.org/10.1002/adfm.201102687>.
- [2] Discerning the Impact of a Lithium Salt Additive in Thin-Film Light-Emitting Electrochemical Cells with Electrochemical Impedance Spectroscopy | *Langmuir*, (n.d.). <https://pubs.acs.org/doi/abs/10.1021/acs.langmuir.6b02415> (accessed January 16, 2021).
- [3] S.B. Meier, D. Hartmann, A. Winnacker, W. Sarfert, The dynamic behavior of thin-film ionic transition metal complex-based light-emitting electrochemical cells, *J. Appl. Phys.* 116 (2014) 104504. <https://doi.org/10.1063/1.4895060>.
- [4] D.B. Strukov, G.S. Snider, D.R. Stewart, R.S. Williams, The missing memristor found, *Nature*. 453 (2008) 80–83. <https://doi.org/10.1038/nature06932>.
